# Supplementary material for: TheArabidopsis thaliana MND1homologue plays a key role in meiotic homologous pairing, synapsis and recombination
Source: Oxford University Press journal article supplement (doi:10.1242/jcs.02967), 2006-06-08
Supplement: jcs02967tables1.pdf [file jcs02967tables1.pdf]

**Table S1. Primer Sequences**

|                          |                                                 |
|--------------------------|-------------------------------------------------|
| M1                       | 5'-CATATGTCTAAGAAACGGGGACTTTC-3'                |
| M2                       | 5'-GTGATCTGATATCTAGAGTCG-3'                     |
| M3                       | 5'-AGGAATATACACATTGATACAGC-3'                   |
| M4                       | 5'-CTAAGCTTCATCTTGTACTAGC-3'                    |
| SPO1                     | 5'-CGTGTCCGAGCATAAAGCTTATGA-3'                  |
| SPO2                     | 5'-CCCTTTGGTTTATCAGAGCTGCAT-3'                  |
| LB-BAR2                  | 5'-TGTGCCAGGTGCCCACGGAATAGT-3'                  |
| LBSALK1                  | 5'-CATCAAACAGGATTTTCGCC-3'                      |
| LBa1                     | 5'-TGGTTCACGTAGTGGGCCATCG-3'                    |
| N610052U                 | 5'-TACGTGTGCTTTTCACCAGA-3'                      |
| N610052L                 | 5'-TGTTGCAACCTTTAAAACCAG-3'                     |
| AHP2_Ncodn               | 5'-TAGTCCATGGCTCCTAAATCGGATAAC-3'               |
| AHP2_PstIup              | 5'-TATGCTGCAGTTACTGTCCTCGAGGCCTC-3'             |
| Mnd1_EcoRI <sub>dn</sub> | 5'-ATCGAATTCATGTCTAAGAAACGGGGACTTTC-3'          |
| MndI_PstIup              | 5'-ATACCTGCAGCTAAGCTTCATCTTGTACTAGC-3'          |
| Actin2.1                 | 5'-CTGCCGCTGTTGTTTCTCCT-3'                      |
| Actin2.2                 | 5'-CGTTGTAGAAAGTGTGATGCCA-3'                    |
| Anchor <sub>dT</sub>     | 5'-GACCACGCGTATCGATGTCGAC(T) <sub>16</sub> V-3' |
| Anchor                   | 5'-GACCACGCGTATCGATGTCGAC-3'                    |
| Mnd1_3RACE1              | 5'-CTGGCAATCAACTTAGGAGTG-3'                     |
| Mnd1_3RACE2              | 5'-AGGGAAGAATCGGAGGAACG-3'                      |
| Mnd1_5RACE1              | 5'-AGCAACTTCAATTGCATTCCTC-3'                    |
| Mnd1_5RACE2              | 5'-TACCATCTCGTTCTTCAGATC-3'                     |
| Mnd1_5RACE3              | 5'-ACTCCTAAGTTGATTGCCAGC-3'                     |
